## Flcn-deficient renal cells are tumorigenic and sensitive to mTOR suppression

Mingsong Wu<sup>1,\*</sup>, Shuhui Si<sup>2,\*</sup>, Yan Li<sup>3</sup>, Susan Schoen<sup>2</sup>, Guang-Qian Xiao<sup>4</sup>, Xueying Li<sup>1</sup>, Bin Tean Teh<sup>5</sup>, Guan Wu<sup>1,4</sup>, Jindong Chen<sup>1,2</sup>

<sup>1</sup>Department of Cell Biology and Genetics, Zunyi Medical University, Zunyi 563099, China

<sup>2</sup>Kidney Cancer Research Laboratory, Department of Urology, University of Rochester Medical Center, Rochester, NY 14642, USA

<sup>3</sup>State Key Laboratory of Bioactive Substances and Functions of Nature Medicines, Institute of Materia Medica, Chinese Academy of Medical Sciences & Peking Union Medical College, Beijing 100050, China

<sup>4</sup>Department of Pathology, University of Rochester Medical Center, Rochester, NY 14642, USA

<sup>5</sup>NCCS-VARI Translational Cancer Research Laboratory, National Cancer Centre, 169610, Singapore

\* These authors have contributed equally to this work

### Correspondence to:

Jindong Chen, e-mail: Jindong\_chen@URMC.rochester.edu

Guan Wu, e-mail: guan\_wu@URMC.rochester.edu

**Keywords:** BHD, RCC, kidney cancer, mTOR, sirolimus

**Received:** July 17, 2015

**Accepted:** September 09, 2015

**Published:** September 21, 2015

## ABSTRACT

**Deficiency of tumor suppressor FLCN leads to the activation of the mTOR signaling pathway in human BHD-associated renal cell carcinomas (RCC). We have previously developed a renal distal tubule-collecting duct-Henle's loop-specific *Flcn* knockout (KO) mouse model (*Flcn*<sup>flox/flox</sup>/*Ksp-Cre*). This mouse model can only survive for three weeks after birth due to the development of polycystic kidney and uremia. Whether these cystic solid hyperplasia changes seen in those KO mice are tumorigenic or malignant is unknown. In this study, we demonstrated that genetic disruption of *Flcn* in mouse kidney distal tubule cells could lead to tumorigenic transformation of these cells to develop allograft tumors with an aggressive histologic phenotype. Consistent with previous reports, we showed that the mTOR pathway plays an important role in the growth of these *Flcn*-deficient allograft and human UOK 257-1 xenograft tumors. We further demonstrated that the mTOR inhibitor, sirolimus, suppresses the tumor's growth, suggesting that mTOR inhibitors might be effective in control of FLCN-deficient RCC, especially in BHD renal tumorigenesis.**

## INTRODUCTION

The mammalian target of rapamycin (mTOR) is a protein kinase that integrates a variety of signaling pathways that regulate cellular growth, proliferation and metabolism [1]. The mTOR molecule involves two functionally distinct, but cross-talk complexes, mTOR complex 1 (mTORC1) and mTOR complex 2 (mTORC2) [2]. Targeting mTOR is one of the therapeutic strategies for many mTOR-related tumorigenesis including kidney cancer [3]. A few mTOR inhibitors have been identified in the past decades [4]. Sirolimus, also known as rapamycin, is one of the inhibitors of mTOR [4]. Sirolimus

provides its therapeutic effects by inhibiting both protein kinase complex mTORC1 and mTORC2. Sirolimus inhibits the growth of many tumor cell lines *in vitro* and exhibits antitumor activity in murine tumor models [4]. Sirolimus also affects angiogenesis in tumors. Guba et al. demonstrated in a mouse model that sirolimus inhibited tumor progression through antiangiogenic activity related to impaired production of VEGF and limiting proliferative response of endothelial cells to stimulation by VEGF [5]. Luan et al. reported similar findings in a mouse model of metastatic renal cell carcinoma (RCC) [6]. Additionally, sirolimus has also been shown to inhibit the progression of dermal Kaposi's sarcoma [7].

FLCN (folliculin), a tumor suppressor, was originally identified from patients with Birt–Hogg–Dubé (BHD) disease [8]. BHD disease is an inherited kidney cancer syndrome that predisposes patients to develop hair follicle tumors, kidney cancers, lung cysts, and spontaneous pneumothorax [8, 9]. Generally, most of kidney cancers (>90%) are renal cell carcinomas (RCC) that are subtyped histologically as clear cell RCC (70–80%), papillary RCC (10–15%), chromophobe RCC (5–10%), and collecting duct carcinoma (<1%). However, of the BHD-related kidney tumors, the majority are chromophobe RCC and chromophobe RCC/oncocytoma hybrid [10]. In addition, besides BHD, there are a few other kidney cancer-related syndromes such as von Hippel-Lindau (VHL) syndrome [11], hereditary papillary renal carcinoma type 1 (HPRC) hereditary leiomyomatosis [12] renal cell cancer (HLRCC), and tuberous sclerosis (TS) [13]. All of the syndromes are genotype-specific, namely, VHL, HPRC, HLRCC, TS, and BHD are caused by mutated *VHL*, *c-Met*, *FH*, *TSC1/TSC2*, and *FLCN*, respectively. Interestingly, while each of the above syndromes is subtype-specific, BHD syndrome predisposes to developing all subtypes of RCCs, which indicates that these syndromes have diverse genetic and pathogenic backgrounds in renal tumorigenesis, and only FLCN plays a role of universal renal tumor suppressor. In addition, FLCN mutations and loss of its mRNA expression have been observed in various types of sporadic tumors including colorectal cancer, endometrial carcinoma, gastric cancer, and other types of tumors developed in BHD patients [8, 15–27], which further suggests that FLCN is a universal cancer suppressor. *In vitro* cell experiments and *in vivo* *Flcn* knockout mouse model studies indicated that loss of FLCN led to the activation of the mTOR pathway [28–34]. These findings suggest that up-regulation of mTOR pathway is involved in BHD tumorigenesis and mTOR could be an effective drug target for FLCN-deficient tumorigenesis.

In our previous study, we have developed a renal distal tubule-collecting duct-Henle's loop-specific *Flcn* knockout (KO) mouse model (*Flcn<sup>flx/flx</sup>/Ksp-Cre*) [31]. This mouse model can only survive three weeks after birth due to the development of polycystic kidneys and uremia. Whether the cystic solid hyperplasia seen in these KO mice is tumorigenic or malignant is unknown. In this study, we demonstrated that cells isolated from the mouse *Flcn*-deficient renal cysts containing cystic solid hyperplasia could evolve into malignant tumorigenic cells *in vitro*, and could develop allograft tumors after being injected into nude mice. Moreover, we further developed a xenograft tumor mouse model by inoculating human FLCN-deficient UOK 257-1 cells [35]. Since no therapeutic approaches for BHD kidney tumorigenesis have been described, targeting the mTOR pathway could be an effective therapeutic strategy for BHD-specific or FLCN-deficient kidney tumorigenesis. Herein, we

treated these allograft and xenograft mouse models with the mTOR inhibitor, sirolimus, and demonstrated that sirolimus could efficiently suppress FLCN-deficient tumor growth.

## RESULTS

### Flcn-deficient renal distal tubule cells evolved into aggressive tumor cells and allograft tumors

To determine whether genetic disruption of *Flcn* in mouse kidney distal tubule cells can lead to development of kidney neoplasm, we have previously generated distal tubule-collecting duct-specific knockout mice by breeding *Flcn<sup>flx/flx</sup>* mice to *Ksp-Cre* transgenic mice with expression of *Cre-recombinase* under the control of the *kidney-specific cadherin promoter* [31]. No substantial solid tumors other than cysts and solid hyperplasia were observed in all the affected mice (Figure 1A–1C), which is likely due to the short lifespan of the *Flcn<sup>flx/flx</sup>/Ksp-Cre* mice due to polycystic changes of the kidneys and uremia. Thus, in this study, we isolated and cultivated cells from the cystic hyperplasia and micro-tumors of kidney-specific homozygous knockout mice *Flcn<sup>flx/flx</sup>/Ksp-Cre*, and inoculated them into athymic nude mice to see whether tumors would develop in these hosts.

The cystic renal cells were isolated from the polycystic kidneys and cultivated *in vitro* for 35 passages or more (Figure 1D). Six *Flcn<sup>flx/flx</sup>/Ksp-Cre* kidneys were used for isolating cystic renal cells. While most of the cells died out, the pre-malignant or malignant cells survived (Figure 1E–1F). Four cell lines were successfully obtained. To determine whether the survived cells are *Flcn*-disrupted, we performed genotyping on the four selected cell lines. All the four cell lines are *Flcn*-deleted (Figure 1G). Western blot analysis further validated the result (Figure 1H). The surviving cells were collected and maintained to establish cell lines. Inoculated subcutaneously in the athymic nude mice, these cells grew into allograft renal tumors after one month (Figure 2A–2B). The control HEK-293 normal kidney cells did not develop any tumors. The *Flcn*-deficient tumors were histologically composed of mixed spindle cells and epithelial cells with high malignant morphology (Figure 2C–2D). Immunohistochemical analysis with a panel of kidney-specific markers (AQP1, PAX2, and CK7) demonstrated that these tumors were renal cell carcinomas. (Figure 2E–2H) The histological features are consistent with sarcomatoid renal cell carcinoma (SRCC) (Figure 2F–2H). Human SRCC accounts for 1% to 5% of all renal malignant neoplasms [36]. Patients with sarcomatoid tumors usually present with poor prognosis for all stages of the disease. While SRCC may evolve from any type of renal cell carcinoma, many reports have noted that chromophobe cell carcinoma is the most common histologic variant associated with SRCC transformation

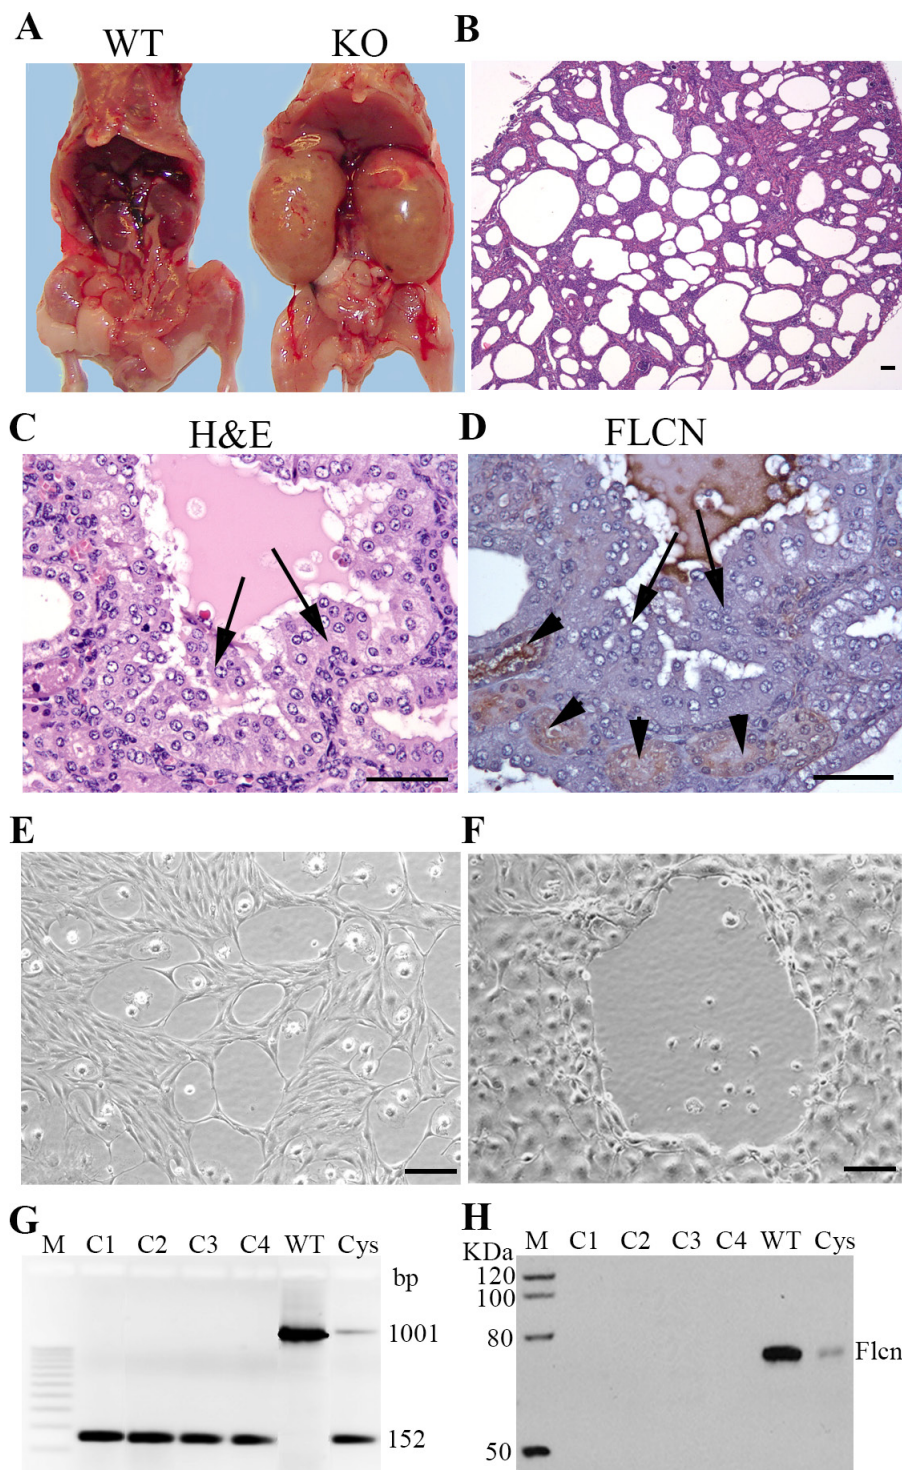

**Figure 1: Generation of tumorigenic Flcn-deficient renal distal tubule cell lines.** **A.** phenotype of the KO (*Flcn<sup>fllox/fllox</sup>/Ksp-Cre* knockout) mice. KO kidneys were enlarged due to polycystic changes compared to WT ones. **B.** H&E staining of the polycystic kidneys of *Flcn<sup>fllox/fllox</sup>/Ksp-Cre* mice at age of 10 days. **C.** hyperplasia/micro-tumors identified in a *Flcn<sup>fllox/fllox</sup>/Ksp-Cre* mouse kidney (indicated by arrows). **D.** No Flcn expression observed in the hyperplasia/micro-tumors (indicated by arrows). Note that the hyperplasia/micro-tumors were Flcn negative compared to the proximal tubules stained positively (indicated by arrow heads). **E, F.** representative cells lines isolated from two *Flcn<sup>fllox/fllox</sup>/Ksp-Cre* polycystic/micro-tumor kidneys and cultured in DMEM medium. **G.** PCR genotyping demonstrated that cell lines derived from four KO kidneys (C1-C4) displayed KO band (152 bp), indicated that *Flcn* had been disrupted. Wild-type kidney (*Flcn<sup>fllox/fllox</sup>*) showed only a wild-type band (1001 bp). Cystic kidney (Cys) had both wild-type band and KO band due to the mixture of *Flcn* disrupted and undisrupted renal cells. **H.** Western blot analysis demonstrated that the cells (C1-C4) have no Flcn expression. Cystic kidney tissue showed weak Flcn expression. WT, wild type; KO, knockout. Cys, cystic kidney. Bar scale, 50  $\mu$ m.

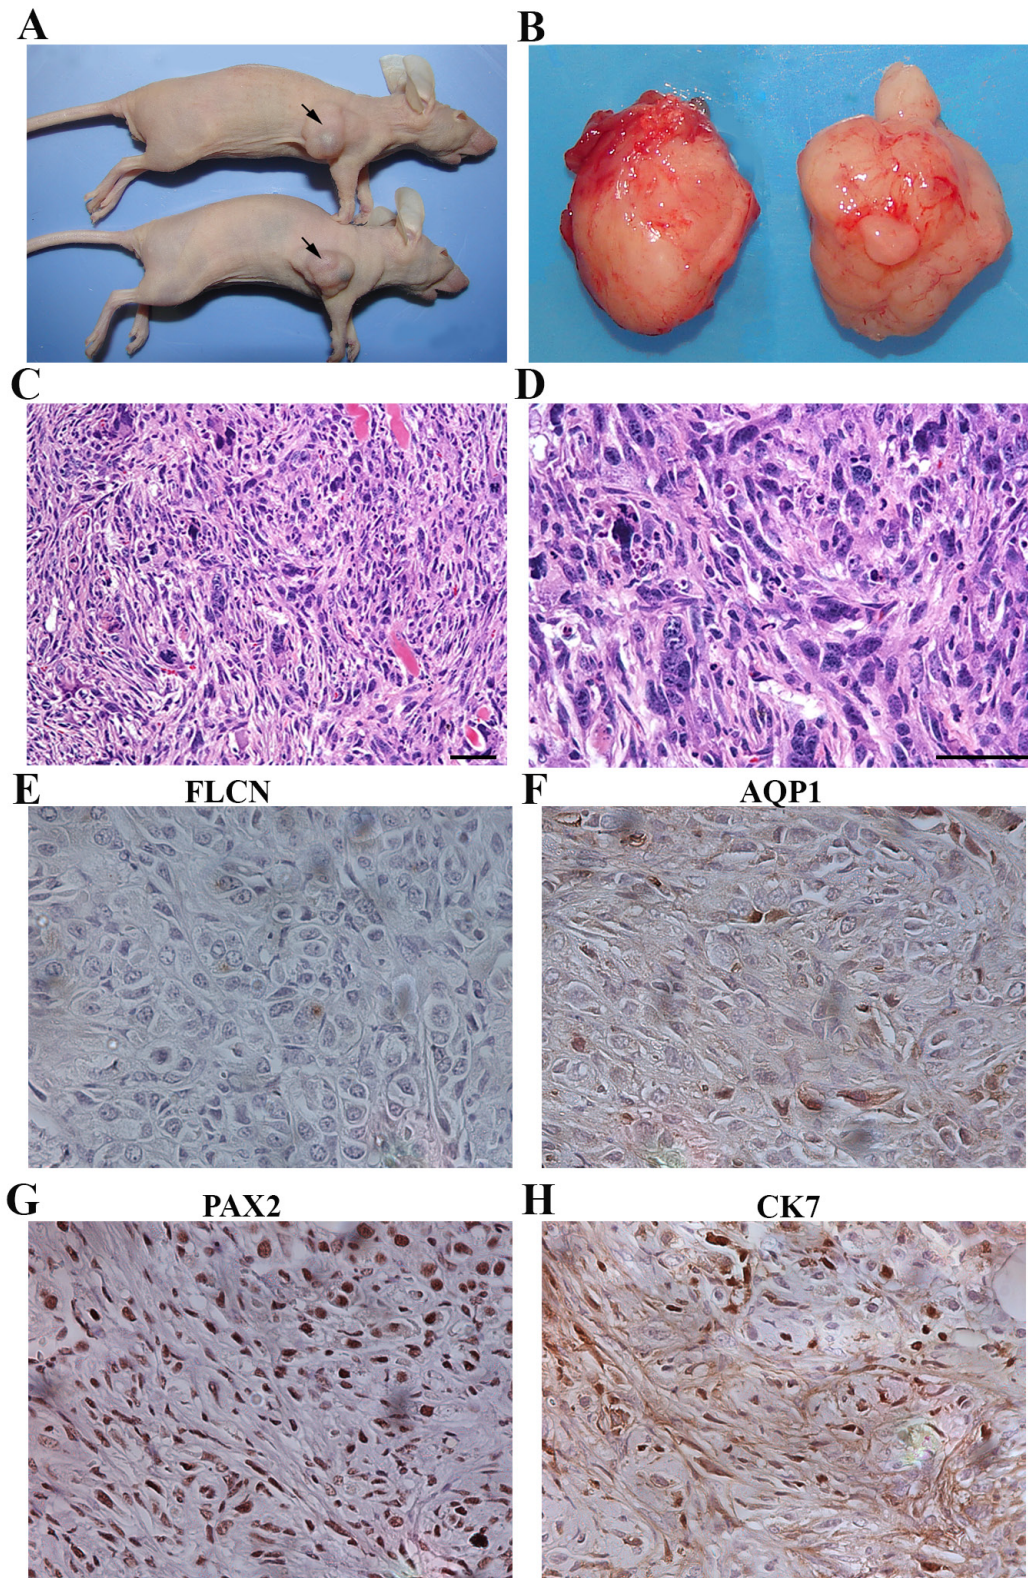

**Figure 2: Flcn-deficient renal distal tubule cells are tumorigenic.** **A.** inoculation of Flcn-deficient renal distal tubule cells developed into allograft tumors in nude mice. **B.** allograft tumors obtained in the nude mice. **C, D.** H&E staining of these tumor tissue sections revealed that all tumors were high-grade renal cell carcinomas (sarcomatoid RCC). **E.** IHC analysis with FLCN antibody showed no Flcn expression in the allograft tumors. **F, G, and H.** IHC analysis by renal cell carcinoma makers (AQP1, PAX2, and CK7) revealed that the allograft tumors were positive for these markers, indicating that the allograft tumors were renal cell carcinomas. Bar scale, 50  $\mu$ m.

[37–43]. Correspondingly, 84% of the human kidney tumors from BHD patients were chromophobe or chromophobe/oncocytoma hybrid [10]. Thus, it is not surprising to see that *Flcn*-deficient renal cystic cells ultimately develop into SRCCs.

### The mTOR pathway was up-regulated in *Flcn*-deficient allograft tumors

To elucidate the biochemical mechanism of the cystogenesis and carcinogenesis related to inactivation of *Flcn* in these allograft tumors, we investigated the possible relevance of *Flcn* to the mTOR signaling pathway. Since we have demonstrated that *Flcn* deficiency leads to the activation of the mTOR pathway in those kidney cysts [31], we expected that mTOR was also activated in these high-grade allograft RCCs originated from the cystic hyperplasia/micro-tumor cells. First, we observed that the allograft tumors (Figure 3A–3B) were *Flcn* negative (Figure 3C–3D), indicating the tumors derived from *Flcn*-null cystic renal tubule cells. We then further examined whether the inactivation of *Flcn* was associated with the up-regulation of mTOR in the allograft tumors as it does in *Flcn*-deficient cysts. Immunohistochemical analysis revealed that mTOR was also activated through phosphorylation in allograft sarcomatoid tumors (Figure 3E–3F), which were *Flcn*-staining negative (Figure 3C–3D). In contrast, the *Flcn*-positive cells showed negative p-mTOR signals. To gain further insight into the relevance of *Flcn* to the mTOR pathway, we next examined the phosphorylated status of the downstream targets S6. Phosphorylated S6 has been observed in some of the tumors (Figure 3G–3H), which is consistent with our observation in kidney cysts of *Flcn<sup>fllox/fllox</sup>/Ksp-Cre* mice. Therefore, these results suggest that *Flcn* is connected to the mTOR signaling network.

### Sirolimus inhibited mouse allograft *Flcn*-deficient tumor growth

To examine whether mTOR inhibitor sirolimus could suppress mouse *Flcn*-deficient tumor growth, we treated the above allograft-bearing nude mice with sirolimus at a dose of 7.5 mg/kg every other day. The treatment started when the allograft tumor reached ~200 mm<sup>3</sup>, and ended at the 21<sup>st</sup> day. The average size of sirolimus-treated tumors increased to ~700 mm<sup>3</sup> while the vehicle-treated control increased to ~2200 mm<sup>3</sup> (Figure 4A–4B). The results indicated that allograft tumor growth was much slower in the sirolimus-treated group compared to the vehicle treated controls, suggesting that sirolimus could significantly inhibit the growth of these allograft tumors (Figure 4C).

To further determine whether a higher dosage of sirolimus would exhibit a dose dependent drug effect, we repeated the experiment by increasing the sirolimus dose to 15 mg/kg. Sirolimus was given to the mice when

the allograft reached ~450 mm<sup>3</sup>. We found that sirolimus showed a strong suppressive effect on allograft tumor growth even when the treatment started later (~450 mm<sup>3</sup> instead of ~200 mm<sup>3</sup>) ( $p < 0.05$ ) (Figure 4D–4F). At the end of treatment, while the average tumor size in the control group grew to ~2700 mm<sup>3</sup>, the average size of sirolimus-treated tumors was ~570 mm<sup>3</sup>, a slight increase from ~450 mm<sup>3</sup>.

To determine whether early-treatment of sirolimus could be more effective, we further performed another experiment by starting the sirolimus treatment when the allograft tumors only reached ~150 mm<sup>3</sup> at a dose of 7.5 mg/kg. While the vehicle-treated control tumors grew fast, the sirolimus-treated tumors stopped growing and shrank (Figure 5A–5B). At the end of the treatment, sirolimus reduced the average tumor size to ~117 mm<sup>3</sup> from average size of ~150 mm<sup>3</sup>, whereas the control tumors reached up to a size of ~2000 mm<sup>3</sup>. Clearly, both high-dose of sirolimus and early-treatment delivered better efficacy ( $p < 0.05$ , Figure 5C). Based on the above experiments, a high dosage (15 mg/kg) of sirolimus and early-treatment (tumor size ~150 mm<sup>3</sup>) could lead to more efficient tumor growth suppression in the allograft mouse model. The differences are statistically significant (Figure 6A–6B).

### Sirolimus suppressed xenograft tumor growth of human *FLCN*-deficient UOK 257-1 cells

After the above results were obtained, we became interested in comparing the mouse allograft model with a human xenograft tumor model. The UOK 257 cell line is the only well-characterized RCC cell line that was derived from a BHD patient. To further test the efficacy of sirolimus on human *FLCN*-deficient RCC growth *in vivo*, we developed a xenograft mouse model by inoculating human *FLCN*-deficient RCC line, UOK 257-1, a cell line derived from a human BHD renal tumor [35]. It has been demonstrated that loss of the *FLCN* leads to the activation of the mTOR pathway in this cell line. Targeting mTOR by its inhibitor sirolimus is expected to suppress the growth of xenograft tumors developed from this cell line. When the tumor size reached 200 mm<sup>3</sup>, sirolimus was given to these mice at a dose of 15 mg/kg every other day. The results demonstrated that sirolimus caused tumor growth inhibition (Figure 7), which is consistent with the results obtained in the allograft tumors though the efficacy was slightly lower compared to the results obtained from the mouse allograft tumors.

## DISCUSSION

In this study, we first isolated the mouse *Flcn*-deficient cells from our previously developed knockout mouse *Flcn<sup>fllox/fllox</sup>/Ksp-Cre* that can only survive three weeks after birth due to the development of polycystic kidneys and blood urea nitrogen (BUN). We further

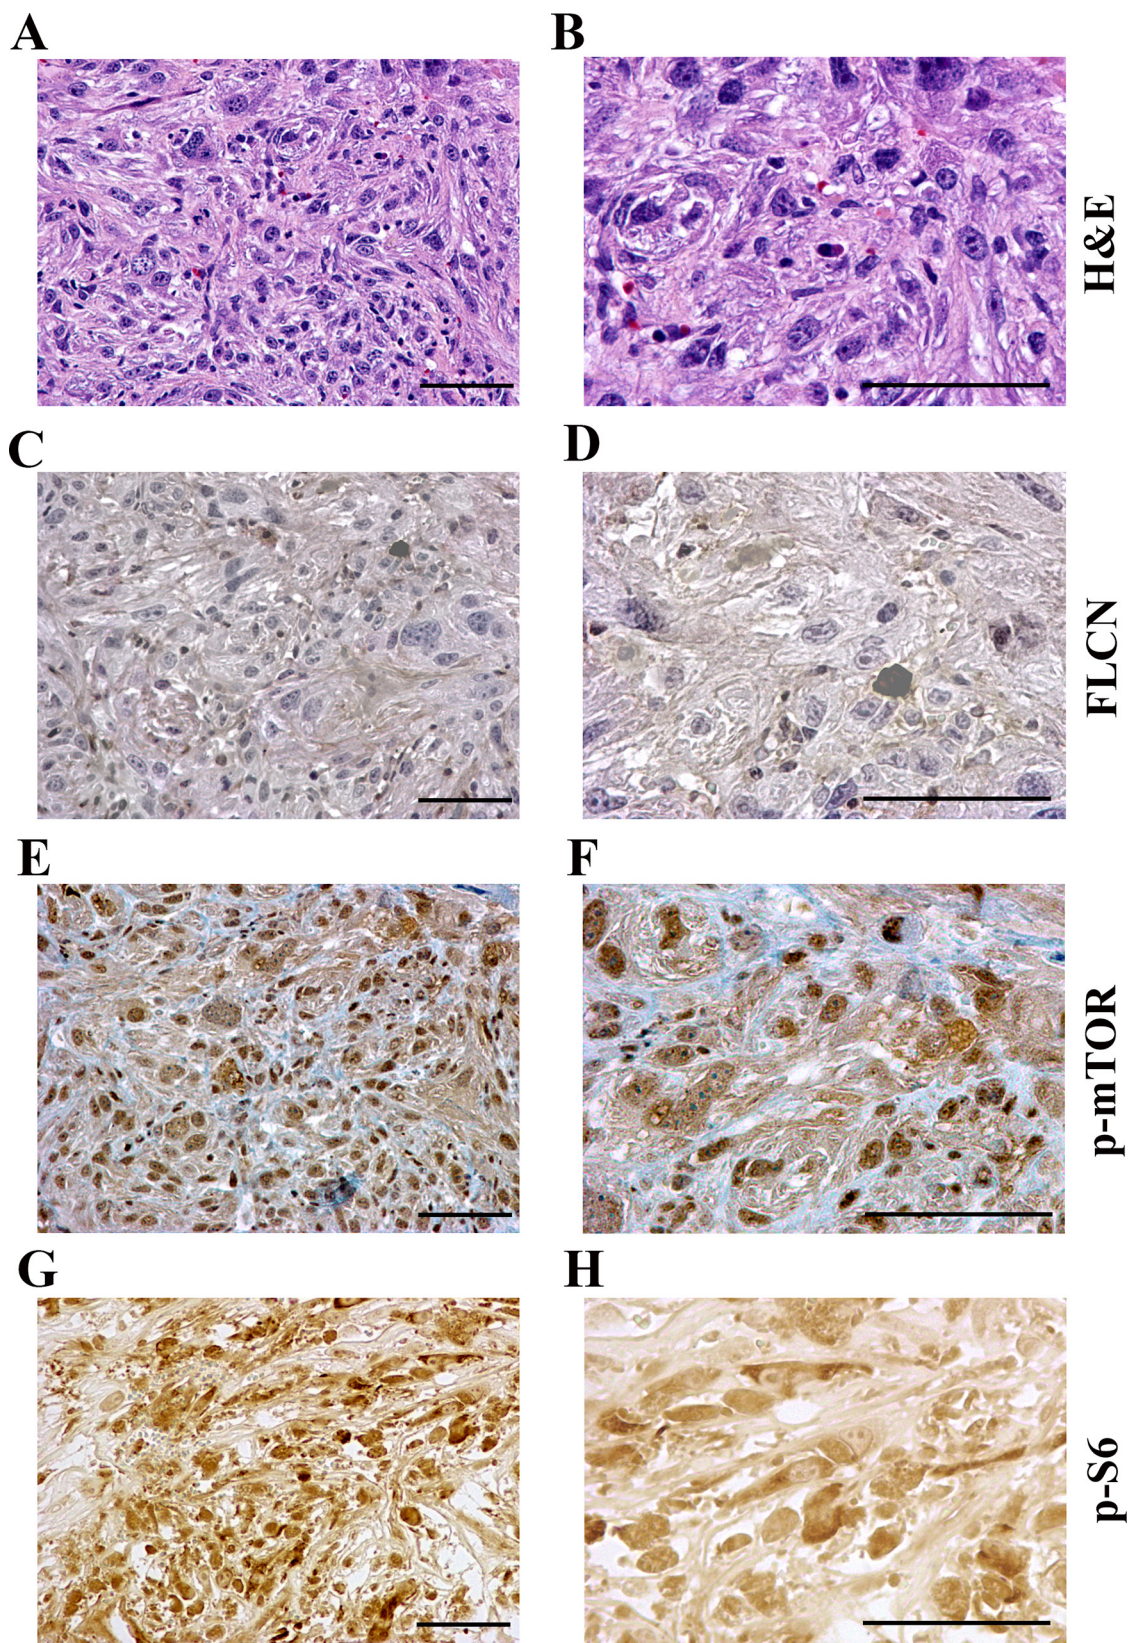

**Figure 3: The mTOR pathway is activated in allograft tumors developed from Flcn-deficient renal distal tubule cell lines. A, B.** H&E staining of tumors. **C, D.** Flcn was not expressed in allograft tumor. **E, F.** mTOR was activated by phosphorylation in Flcn-deficient tumor. **G, H.** phosphorylated activation of S6 was also observed in tumors. Bar scale, 50  $\mu$ m.

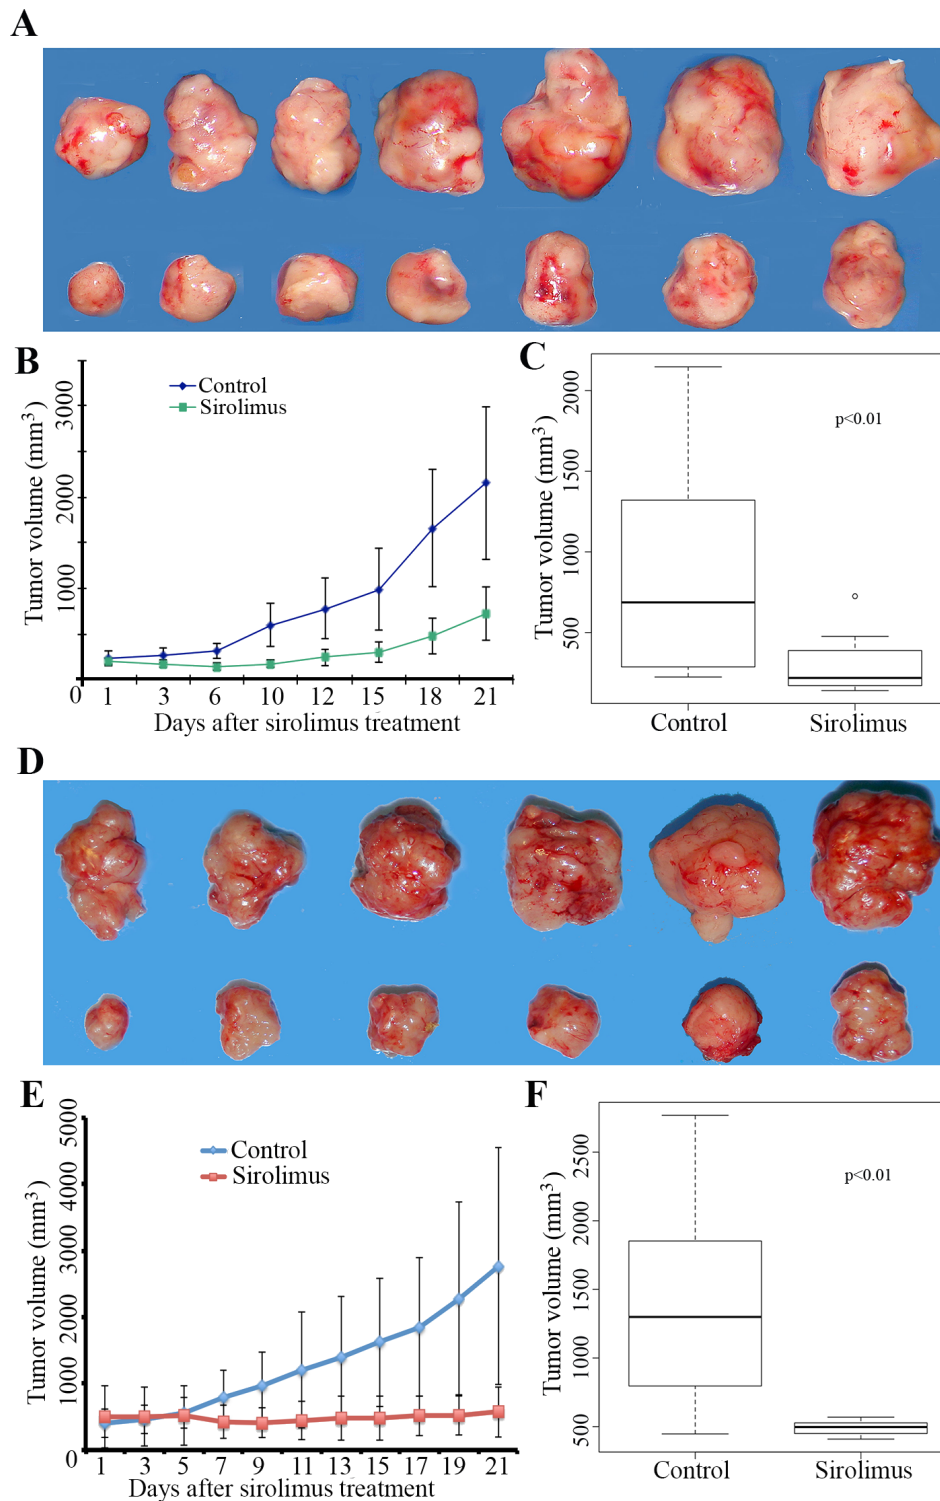

**Figure 4: Sirolimus inhibits mouse allograft Flcn-deficient tumor growth.** **A.** representative tumors photographed from both sirolimus-treated mice (upper panel) and vehicle-treated control mice (lower panel). Sirolimus (7.5 mg/kg) was given every other day when allograft tumor size reached 200 mm<sup>3</sup>. **B.** growth curve of sirolimus-treated mice and vehicle-treated control mice. **C.** tumor growth was inhibited significantly by sirolimus compared to vehicle-treated controls ( $p < 0.01$ ,  $t$ -test, showed in C). At the end of the treatment, tumors continued to grow slowly. **D.** representative tumors photographed from both sirolimus-treated mice (upper panel) and vehicle-treated control mice (lower panel). Sirolimus at a high dose (15 mg/kg) was given to treat the allograft tumors when the tumor size reached 450 mm<sup>3</sup>. **E.** growth curves of sirolimus-treated mice with high dosage of sirolimus treatment (15 mg/kg) and vehicle-treated control mice. **F.** tumor growth was inhibited significantly by sirolimus compared to vehicle-treated controls ( $p < 0.01$ , showed in F). Note that tumor growth had essentially stopped when treated with a higher dose of sirolimus.

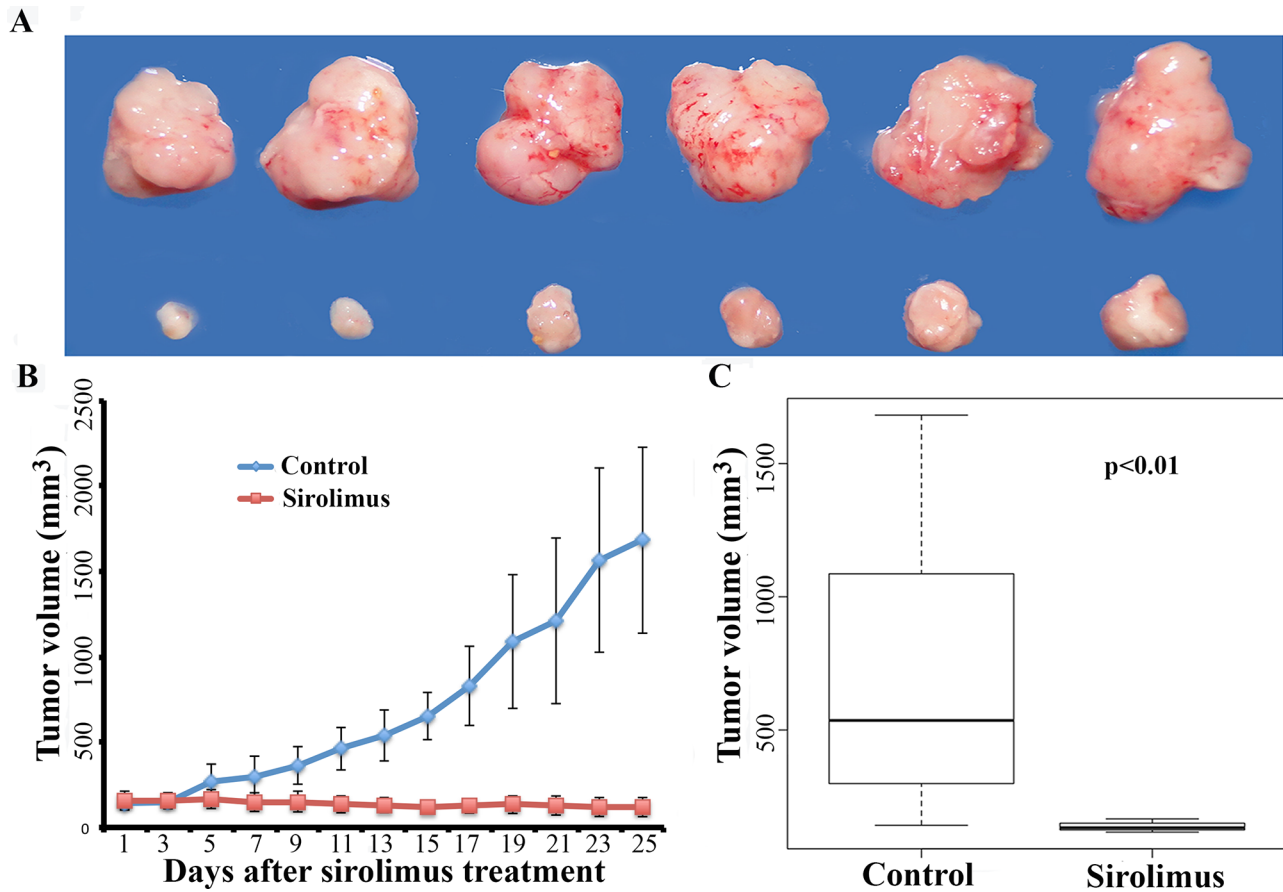

**Figure 5: Sirolimus inhibits tumor growth.** A. representative tumors photographed from both sirolimus-treated mice (upper panel) and vehicle-treated control mice (lower panel). B, C. sirolimus (7.5 mg/kg) was given to the treatment group when allograft tumor size reached 150 mm<sup>3</sup>. Tumor growth was inhibited significantly by sirolimus compared to vehicle-treated controls (C). At the end of the treatment, allograft tumors shrank slightly.

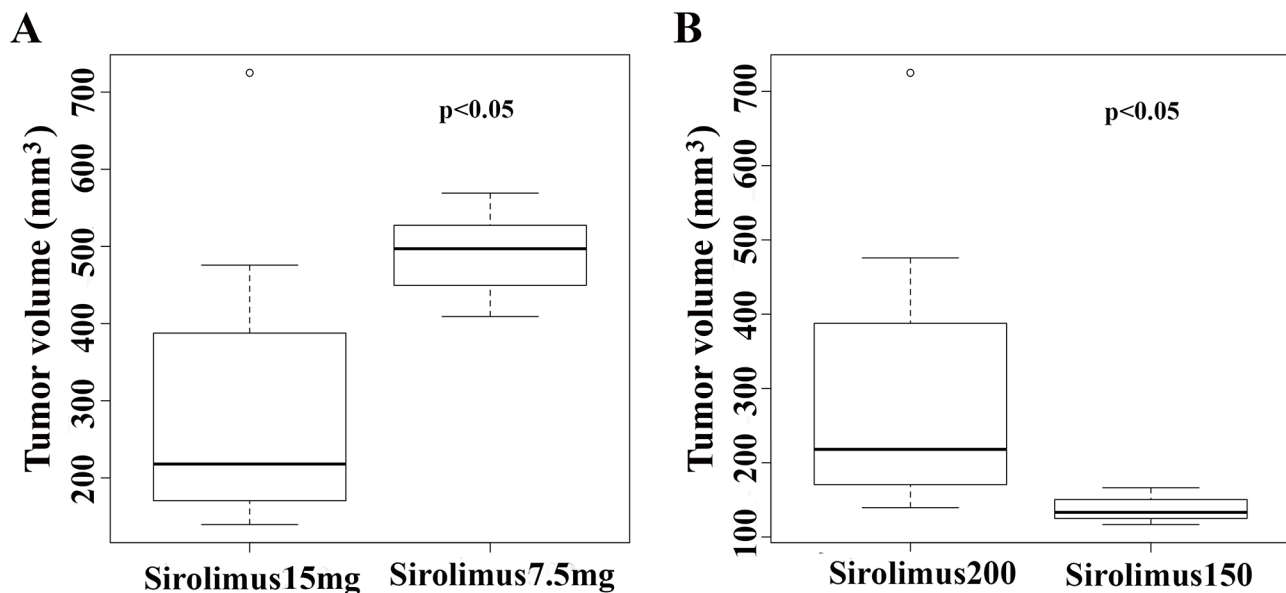

**Figure 6: High dosages of sirolimus and early treatment lead to better treatment effects on tumor.** A. high dosage of sirolimus (15 mg/kg) exerted stronger inhibition on allograft tumor growth compared with low dose (7.5 mg/kg) ( $p < 0.05$ ). B. sirolimus exerted more efficient suppression on smaller tumors at an early-stage (tumor size, <math>< 150 \text{ mm}^3</math>).



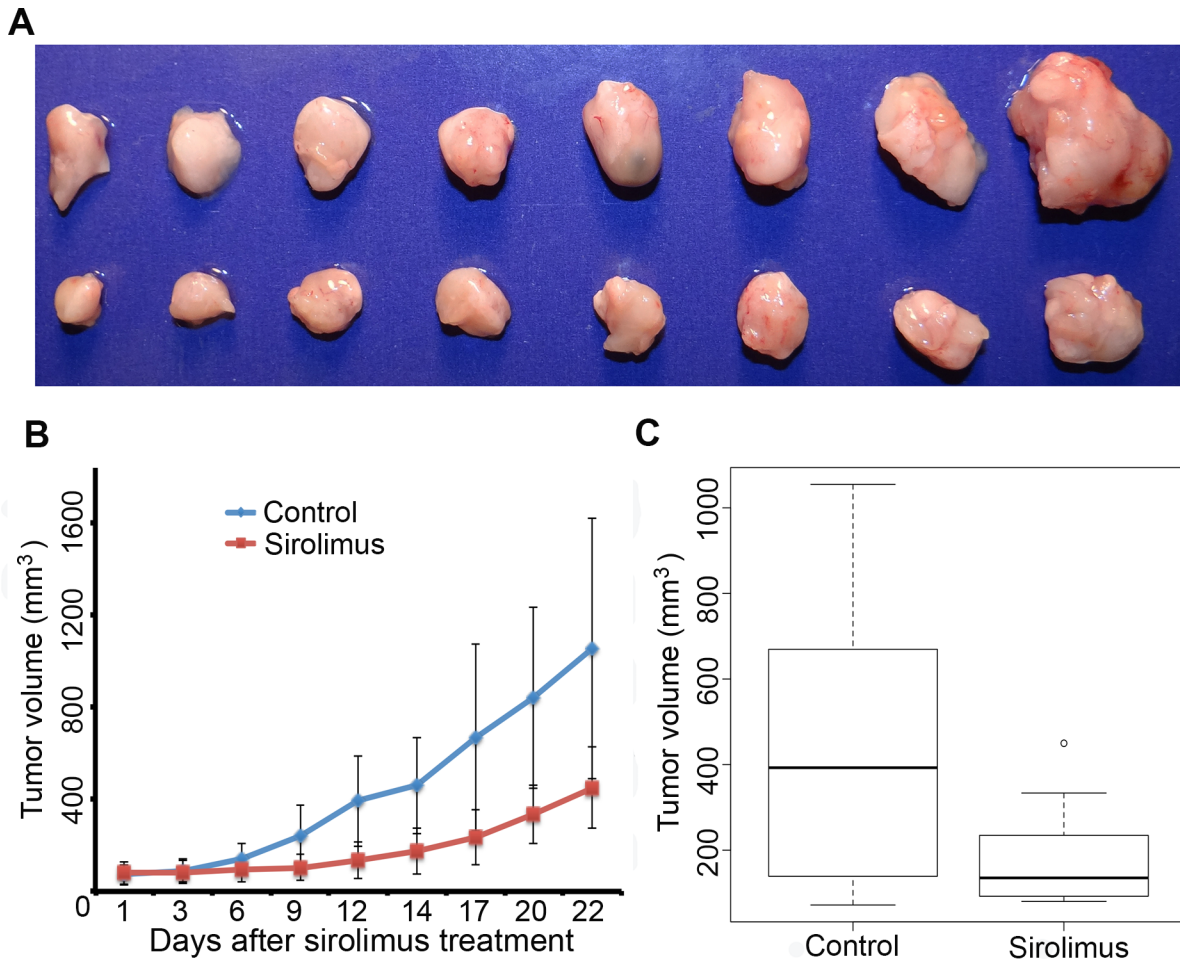

**Figure 7: Sirolimus inhibits human UOK 257-1 xenograft tumor growth.** **A.** representative tumors photographed from both sirolimus-treated mice (upper panel) and vehicle-treated control mice (lower panel) at the end of the experiments (day 22). Sirolimus (15 mg/kg) was given every other day for 21 days when allograft tumor size reached 200 mm<sup>3</sup>. **B.** growth curves of sirolimus-treated mice and vehicle-treated control mice. **C.** at the end of treatment, tumors were significantly smaller in sirolimus-treated group compared to vehicle-treated controls ( $p < 0.05$ ).

demonstrated that these Flcn-deficient cells could evolve into tumorigenic cells and develop allograft tumors in athymic nude mice. The ability of the cells to develop into allograft tumors implies that deficiency of Flcn in kidney distal tubule-collecting duct-Henle's loop would lead to kidney cancer if the *Flcn*<sup>flx/flx</sup>/*Ksp-Cre* mice could survive longer. Our *in vitro* culture process might have played a significant role in "natural" selection of these premalignant or malignant cells. To our knowledge, this is the first time that by harvesting potential tumorigenic cells from an organ-specific tumor suppressor knockout mouse model and culturing these cells *in vitro* to overcome the shorter life expectancy of the knockout mouse model, the tumorigenic capability of cells with a tumor suppressor gene disruption was able to be tested. Otherwise, these cells would not have lived long enough *in vivo* to generate tumors.

The mouse allograft tumors also displayed the features of sarcomatoid RCC, indicating that loss of Flcn

in renal distal tubule cells could result in highly aggressive tumors from these cells. Similar to renal cysts developed from our *Flcn*<sup>flx/flx</sup>/*Ksp-Cre* mice, these allograft tumors also exhibited the activation of the mTOR pathway, which is consistent with the previous findings in FLCN-deficient cell lines and animal models. To test whether mTOR inhibitors, such as sirolimus, could suppress tumor growth in allograft mice as well, we treated the allograft mice with various concentrations of sirolimus. Our results demonstrated that sirolimus could effectively inhibit Flcn-deficient allograft tumor growth, suggesting that mTOR inhibitors may be effective in treating FLCN-deficient RCC. Additionally, we demonstrated that a higher dose of sirolimus and earlier treatment delivered a better suppressive effect on tumor growth, showing a dose-dependent manner in tumor suppression.

To determine whether sirolimus can also exert suppression on human FLCN-deficient tumor growth, we developed a xenograft tumor mouse model for testing

by inoculating human FLCN-deficient UOK 257-1 cells that were isolated from the original UOK 257 line [35]. Similarly, treatment of the UOK 257-1 xenograft with sirolimus led to suppression of tumor growth. Interestingly, it appeared that sirolimus was somewhat less effective against human UOK 257-1 xenograft tumor growth at a dose of 15 mg/kg compared to mouse allograft tumors. After 12 days treatment, the sirolimus-treated tumors started to grow, though much slower than the control group, suggesting that the tumors might have gradually developed resistance to sirolimus. In addition, the genetic background of the human UOK 257-1 cell line is probably different from the mouse allograft tumors, potentially carrying more DNA mutations, which may lead to the activation of other signaling pathways besides mTOR. Nonetheless, significant tumor suppression was observed in sirolimus-treated UOK 257-1 xenograft tumors. Thus, we provided first evidence that the mTOR inhibitor, sirolimus, can efficiently suppress both allograft and xenograft FLCN-deficient tumor growth.

Since the role of mTOR in cell proliferation and survival has been a major focus of research in human oncogenesis [44], and many genes associated with tumor-prone syndromes (e.g. hamartoma syndromes) are involved in the mTOR pathway [45], there has been considerable effort in developing mTOR-targeting drugs for use in oncology. In the case of kidney cancer, a sirolimus analog, temsirolimus, was approved for treating advanced stage RCC in 2007 based on a Phase III study and has been proven to be effective against RCCs that were primarily clear cell subtype [46]. The clinical benefit of temsirolimus for patients was demonstrated in the study comparing temsirolimus with interferon alpha (IFN-alpha) or combined temsirolimus plus IFN-alpha as first-line treatment of advanced RCC, showing treatment with temsirolimus alone significantly increased median overall survival in poor-risk, advanced RCC patients (10.9 vs 7.3 vs 8.4 months) [46]. To test whether temsirolimus is effective on other RCC subtypes, in another clinical study, temsirolimus was used for treating patients with non clear-cell and sarcomatoid variant ccRCC subtypes. The results indicated that the benefit from mTOR inhibitor was limited [47]. For the BHD-specific kidney tumorigenesis, the therapeutic approach could be different due to its specific genetic background and histological characteristics [14]. For example, while most of the kidney cancer-related genes are subtype-specific, FLCN mutations lead to all subtypes of RCCs that have been observed in BHD syndrome patients and knockout mouse models [10, 34, 48]. Thus, FLCN-deficient renal tumorigenesis might be associated with more than one pathway. In this study, we demonstrated that mTOR inhibitor, sirolimus, is able to suppress FLCN-deficient allograft and xenograft tumor growth. Currently, therapeutic approaches for BHD renal tumorigenesis and other mTOR-related FLCN-deficient neoplasia have not yet been described. Our findings could

provide insights into the therapeutic strategy for BHD renal tumorigenesis and other FLCN-mTOR related tumor growth.

## MATERIALS AND METHODS

### Distal tubule-collecting duct-Henle's loop-specific knockout mice

The generation of distal tubule-collecting duct-Henle's loop-specific mice has been described in our previous study [31]. Briefly, *Flcn<sup>fllox/fllox</sup>* mice were first bred to *Ksp-Cre* transgenic mice to generate kidney-specific *Flcn* heterozygous knockout mice, *Flcn<sup>fllox/+</sup>/Ksp-Cre*. These *Flcn<sup>fllox/+</sup>/Ksp-Cre* heterozygotes were then backcrossed to *Flcn<sup>fllox/fllox</sup>* mice to generate kidney-specific homozygous knockout mice *Flcn<sup>fllox/fllox</sup>/Ksp-Cre*. The knockout mice developed polycystic kidneys with hyperplasia and early stage tumors (micro-tumors) [24]. However, the affected mice die from uremia within three weeks after birth and are not amenable to drug testing. To establish a *Flcn*-deficient mouse renal tumor model for drug study, cells from renal cysts and micro tumors of the affected *Flcn<sup>fllox/fllox</sup>/Ksp-Cre* kidneys were isolated and cultured in DMEM medium as described below.

### Isolation and culture of *Flcn*-deficient renal distal tubule cells

Six affected *Flcn<sup>fllox/fllox</sup>/Ksp-Cre* mice at age 20 days were used for isolation of *Flcn*-deficient renal distal tubule cells. Six cystic kidney tissues were aseptically excised from polycystic kidneys and each of them was transferred to a cell culture dish with DMEM medium, respectively. The tissues were then rinsed in sterile PBS. Fatty tissues, blood clots, and connective tissues were removed with forceps and scissors. Cleaned cystic tissues were finely minced into very small pieces in 0.25% trypsin-EDTA with sterile scissors. Tissue pieces were disassociated into small aggregates by vigorous pipetting. Heavier pieces were removed through sedimentation by gravity. Supernatant containing cell aggregates was transferred into a 15-ml centrifuge tube and centrifuged for 10 min at 1000 rpm. Cells were washed twice in PBS and transferred into a 25-cm<sup>2</sup> flask and cultured in DMEM medium with 15% FBS. These cells were incubated at 37°C with 5% CO<sub>2</sub>. Medium was changed every 3 days. The cells were cultured for 35 passages.

### Genotyping

*Flcn<sup>fllox/fllox</sup>/Ksp-Cre* cells were harvested by scraping and collected in a 15-ml tube. After centrifugation, the cell pellet was resuspended in a solution of SDS detergent and proteinase K, and the mixture was incubated at 55°C for one hour. The sample was then phenol extracted once with

a phenol/chloroform/isoamyl alcohol solution, and the aqueous layer was removed to a fresh microcentrifuge tube after centrifugation. The DNA was ethanol precipitated, resuspended in buffer, and then ethanol precipitated a second time. Once the pellet was dried, buffer was added and the DNA was re-suspended by incubation at 55°C overnight, after which the genomic DNA solution was assayed by the polymerase chain reaction (PCR). Genotyping was performed by PCR according to the previous report [31].

### Protein analysis

Whole-cell extracts were also prepared from these cells by lysing in 1% Nonidet P-40, 50 mM Tris (pH 7.4), 150 mM NaCl, 1 mM EDTA, and 15% glycerol, including standard protease inhibitors. Protein extracts were size separated by 8% SDS-PAGE and transferred to PVDF membranes. For the analysis of Flcn expression, Flcn was detected with an anti-FLCN monoclonal antibody at a dilution of 1:500 and an enhanced chemiluminescence detection system.

### Transplantation of Flcn-deficient renal cells into athymic nude mouse

Mouse Flcn-deficient renal distal tubule cells were maintained in DMEM medium with 10% FBS. Cells were harvested after 35 passages. Cells were washed with PBS and counted using a hemocytometer. Approximately  $5 \times 10^6$  cells in 0.2 ml HBSS were transplanted subcutaneously into the flank area of each athymic nude mouse (B6.Cg-*Foxn1*<sup>tm/J</sup>, The Jackson Laboratory, USA). In the same fashion, approximately  $5 \times 10^6$  fast-growing human FLCN-deficient UOK 257-1 cells that were isolated from the original UOK 257 (gift from NCI) [35] were inoculated subcutaneously into each of 30 athymic nude mice to generate a human FLCN-deficient xenograft model. Fifteen mice were used for each experimental group. Same amount of HEK-293 normal kidney cells were inoculated into nude mice as control.

### Sirolimus treatment of allograft and xenograft mice

For each treatment experiment, 30 allograft or 30 xenograft athymic nude mice were equally randomized to one treatment group and one control group, with 15 mice in each group. Treatment commenced when the mice reached two months of age and tumors reached required sizes (150 mm<sup>3</sup>, 200 mm<sup>3</sup>, and 500 mm<sup>3</sup>). Sirolimus was formulated in a water solution containing 5% PEG-400, 4% ethanol, and 5% Tween-80. Each mouse in the treatment group received 7.5, 10, or 15 mg/kg body-weight sirolimus in 100 µl solution every other day

through intraperitoneal injection, depending on treatment group. Mice in the vehicle control group were injected with 100 µl vehicle solution (5% PEG-400, 4% ethanol, and 5% Tween-80) each. All the mice were euthanized at the end of treatment.

### Immunohistochemistry

The antibodies used included mouse anti-FLCN mAb (N-terminal peptide: PQGDGNEDSPGQGEQC, produced at the Van Andel Research Institute), anti-Phospho-AKT Rabbit mAb (Cell Signaling), anti-Phospho-mTOR Rabbit mAb (Cell Signaling), anti-Phospho-S6 Ribosomal Protein (Cell Signaling). AQP1 (sc-25287, Santa Cruz Biotechnology); PAX2 (2549-1, Epitomics); CK7 (ab9021, Abcam; sc-80021, Santa Cruz Biotechnology) to determine RCC subtypes. Immunohistochemical analysis was performed following the manufacturers' protocols.

### ACKNOWLEDGMENTS AND FUNDING

The authors would like to thank the following core facilities for their services: the Van Andel Research gene-targeting core and the vivarium; and the University of Rochester Medical Center vivarium.

### CONFLICTS OF INTEREST

No potential conflicts of interest were disclosed.

### Authors' contributions

**Conception and design:** J. Chen, BT Teh, G. Wu.

**Development of methodology:** J. Chen, S. Si, X. Li, Y. Li.

**Acquisition of data (provided animals, acquired and managed patients, provided facilities, etc.):** S. Si, X. Li, Y. Li, J. Chen.

**Analysis and interpretation of data (e.g., statistical analysis, biostatistics, histology and immunochemistry, PCR, Western blot, et. al):** J. Chen, S. Si, X. Li, Y. Li, M. Wu, G. Xiao, G. Wu.

**Writing, review, and/or revision of the manuscript:** J. Chen, S. Schoen, G. Xiao, G. Wu.

**Administrative, technical, or material support (i.e. reporting or organizing data, constructing databases):** S. Si, X. Li, Y. Li, S. Schoen, J. Chen.

**Study supervision:** J. Chen, G. Wu.

### Editorial note

This paper has been accepted based in part on peer-review conducted by another journal and the authors' response and revisions as well as expedited peer-review in *Oncotarget*.

## REFERENCES

1. Manning BD, Cantley LC. AKT/PKB signaling: navigating downstream. *Cell*. 2007; 129:1261–74.
2. Xu K, Liu P, Wei W. mTOR signaling in tumorigenesis. *Biochimica et biophysica acta*. 2014; 1846:638–54.
3. Chiarini F, Evangelisti C, McCubrey JA, Martelli AM. Current treatment strategies for inhibiting mTOR in cancer. *Trends in pharmacological sciences*. 2015; 36:124–35.
4. Zaytseva YY, Valentino JD, Gulhati P, Evers BM. mTOR inhibitors in cancer therapy. *Cancer letters*. 2012; 319:1–7.
5. Guba M, von Breitenbuch P, Steinbauer M, Koehl G, Flegel S, Hornung M, et al. Rapamycin inhibits primary and metastatic tumor growth by antiangiogenesis: involvement of vascular endothelial growth factor. *Nature medicine*. 2002; 8:128–35.
6. Luan FL, Ding R, Sharma VK, Chon WJ, Lagman M, Suthanthiran M. Rapamycin is an effective inhibitor of human renal cancer metastasis. *Kidney international*. 2003; 63:917–26.
7. Stallone G, Schena A, Infante B, Di Paolo S, Loverre A, Maggio G, et al. Sirolimus for Kaposi's sarcoma in renal-transplant recipients. *The New England journal of medicine*. 2005; 352:1317–23.
8. Nickerson ML, Warren MB, Toro JR, Matrosova V, Glenn G, Turner ML, et al. Mutations in a novel gene lead to kidney tumors, lung wall defects, and benign tumors of the hair follicle in patients with the Birt-Hogg-Dube syndrome. *Cancer Cell*. 2002; 2:157–64.
9. Birt AR, Hogg GR, Dube WJ. Hereditary multiple fibrofolliculomas with trichodiscomas and acrochordons. *Arch Dermatol*. 1977; 113:1674–7.
10. Pavlovich CP, Walther MM, Eyler RA, Hewitt SM, Zbar B, Linehan WM, et al. Renal tumors in the Birt-Hogg-Dube syndrome. *Am J Surg Pathol*. 2002; 26:1542–52.
11. Latif F, Tory K, Gnarr J, Yao M, Duh FM, Orcutt ML, et al. Identification of the von Hippel-Lindau disease tumor suppressor gene. *Science*. 1993; 260:1317–20.
12. Franksson C, Bergstrand A, Ljungdahl I, Magnusson G, Nordenstam H. Renal carcinoma (hypernephroma) occurring in 5 siblings. *The Journal of urology*. 1972; 108:58–61.
13. Launonen V, Vierimaa O, Kiuru M, Isola J, Roth S, Pukkala E, et al. Inherited susceptibility to uterine leiomyomas and renal cell cancer. *Proceedings of the National Academy of Sciences of the United States of America*. 2001; 98:3387–92.
14. Klomp JA, Petillo D, Niemi NM, Dykema KJ, Chen J, Yang XJ, et al. Birt-Hogg-Dube renal tumors are genetically distinct from other renal neoplasias and are associated with up-regulation of mitochondrial gene expression. *BMC medical genomics*. 2010; 3:59.
15. da Silva NF, Gentle D, Hesson LB, Morton DG, Latif F, Maher ER. Analysis of the Birt-Hogg-Dube (BHD) tumour suppressor gene in sporadic renal cell carcinoma and colorectal cancer. *Journal of medical genetics*. 2003; 40:820–4.
16. Kahnoski K, Khoo SK, Nassif NT, Chen J, Lobo GP, Segelov E, et al. Alterations of the Birt-Hogg-Dube gene (BHD) in sporadic colorectal tumours. *Journal of medical genetics*. 2003; 40:511–5.
17. Khoo SK, Kahnoski K, Sugimura J, Petillo D, Chen J, Shockley K, et al. Inactivation of BHD in sporadic renal tumors. *Cancer Res*. 2003; 63:4583–7.
18. Shin JH, Shin YK, Ku JL, Jeong SY, Hong SH, Park SY, et al. Mutations of the Birt-Hogg-Dube (BHD) gene in sporadic colorectal carcinomas and colorectal carcinoma cell lines with microsatellite instability. *Journal of medical genetics*. 2003; 40:364–7.
19. Warren MB, Torres-Cabala CA, Turner ML, Merino MJ, Matrosova VY, Nickerson ML, et al. Expression of Birt-Hogg-Dube gene mRNA in normal and neoplastic human tissues. *Modern pathology : an official journal of the United States and Canadian Academy of Pathology, Inc*. 2004; 17:998–1011.
20. Lamberti C, Schweiger N, Hartschuh W, Schulz T, Becker-Wegerich P, Kuster W, et al. Birt-Hogg-Dube syndrome: germline mutation in the (C)8 mononucleotide tract of the BHD gene in a German patient. *Acta Derm Venereol*. 2005; 85:172–3.
21. Painter JN, Tapanainen H, Somer M, Tukiainen P, Aittomaki K. A 4-bp deletion in the Birt-Hogg-Dube gene (FLCN) causes dominantly inherited spontaneous pneumothorax. *Am J Hum Genet*. 2005; 76:522–7.
22. Schmidt LS, Nickerson ML, Warren MB, Glenn GM, Toro JR, Merino MJ, et al. Germline BHD-mutation spectrum and phenotype analysis of a large cohort of families with Birt-Hogg-Dube syndrome. *Am J Hum Genet*. 2005; 76:1023–33.
23. Vocke CD, Yang Y, Pavlovich CP, Schmidt LS, Nickerson ML, Torres-Cabala CA, et al. High frequency of somatic frameshift BHD gene mutations in Birt-Hogg-Dube-associated renal tumors. *J Natl Cancer Inst*. 2005; 97:931–5.
24. Fujii H, Jiang W, Matsumoto T, Miyai K, Sashara K, Ohtsuji N, et al. Birt-Hogg-Dube gene mutations in human endometrial carcinomas with microsatellite instability. *The Journal of pathology*. 2006; 209:328–35.
25. Gunji Y, Akiyoshi T, Sato T, Kurihara M, Tominaga S, Takahashi K, et al. Mutations of the Birt Hogg Dube gene in patients with multiple lung cysts and recurrent pneumothorax. *Journal of medical genetics*. 2007; 44:588–93.
26. Jiang W, Fujii H, Matsumoto T, Ohtsuji N, Tsurumaru M, Hino O. Birt-Hogg-Dube (BHD) gene mutations in human gastric cancer with high frequency microsatellite instability. *Cancer letters*. 2007; 248:103–11.

27. Sundaram S, Tasker AD, Morrell NW. Familial spontaneous pneumothorax and lung cysts due to a Folliculin exon 10 mutation. *Eur Respir J*. 2009; 33:1510–2.
28. Baba M, Hong SB, Sharma N, Warren MB, Nickerson ML, Iwamatsu A, et al. Folliculin encoded by the BHD gene interacts with a binding protein, FNIP1, and AMPK, and is involved in AMPK and mTOR signaling. *Proceedings of the National Academy of Sciences of the United States of America*. 2006; 103:15552–7.
29. Singh SR, Zhen W, Zheng Z, Wang H, Oh SW, Liu W, et al. The Drosophila homolog of the human tumor suppressor gene BHD interacts with the JAK-STAT and Dpp signaling pathways in regulating male germline stem cell maintenance. *Oncogene*. 2006; 25:5933–41.
30. van Slegtenhorst M, Khabibullin D, Hartman TR, Nicolas E, Kruger WD, Henske EP. The Birt-Hogg-Dube and tuberous sclerosis complex homologs have opposing roles in amino acid homeostasis in *Schizosaccharomyces pombe*. *J Biol Chem*. 2007; 282:24583–90.
31. Chen J, Futami K, Petillo D, Peng J, Wang P, Knol J, et al. Deficiency of FLCN in mouse kidney led to development of polycystic kidneys and renal neoplasia. *PLoS One*. 2008; 3:e3581.
32. Baba M, Furihata M, Hong SB, Tessarollo L, Haines DC, Southon E, et al. Kidney-targeted Birt-Hogg-Dube gene inactivation in a mouse model: Erk1/2 and Akt-mTOR activation, cell hyperproliferation, and polycystic kidneys. *J Natl Cancer Inst*. 2008; 100:140–54.
33. Hartman TR, Nicolas E, Klein-Szanto A, Al-Saleem T, Cash TP, Simon MC, et al. The role of the Birt-Hogg-Dube protein in mTOR activation and renal tumorigenesis. *Oncogene*. 2009; 28:1594–604.
34. Hasumi Y, Baba M, Ajima R, Hasumi H, Valera VA, Klein ME, et al. Homozygous loss of BHD causes early embryonic lethality and kidney tumor development with activation of mTORC1 and mTORC2. *Proceedings of the National Academy of Sciences of the United States of America*. 2009; 106:18722–7.
35. Yang Y, Padilla-Nash HM, Vira MA, Abu-Asab MS, Val D, Worrell R, et al. The UOK 257 cell line: a novel model for studies of the human Birt-Hogg-Dube gene pathway. *Cancer Genet Cytogenet*. 2008; 180:100–9.
36. Staelens L, Van Poppel H, Vanuytsel L, Van Oosterom A, Van Damme B, Baert L. Sarcomatoid renal cell carcinoma: case report and review of the literature. *Acta Urol Belg*. 1997; 65:39–42.
37. Akhtar M, Tulbah A, Kardar AH, Ali MA. Sarcomatoid renal cell carcinoma: the chromophobe connection. *Am J Surg Pathol*. 1997; 21:1188–95.
38. Hirokawa M, Shimizu M, Sakurai T, Terayama K, Manabe T. Sarcomatoid renal cell carcinoma with chromophobe cell foci. Report of a case. *Apmis*. 1998; 106:993–6.
39. Nagashima Y, Okudela K, Osawa A, Nakamura N, Kawasaki C, Moriyama M, et al. Chromophobe renal cell carcinoma with sarcomatoid change. A case report. *Pathol Res Pract*. 2000; 196:647–51. discussion 52.
40. Tardio JC. Chromophobe cell renal carcinomas with sarcomatoid areas. *Histopathology*. 2000; 36:184–5.
41. Abrahams NA, Ayala AG, Czerniak B. Chromophobe renal cell carcinoma with sarcomatoid transformation. *Ann Diagn Pathol*. 2003; 7:296–9.
42. Parada D, Pena K, Moreira O. Sarcomatoid chromophobe renal cell carcinoma. A case report and review of the literature. *Arch Esp Urol*. 2006; 59:209–14.
43. Brunelli M, Gobbo S, Cossu-Rocca P, Cheng L, Hes O, Delahunt B, et al. Chromosomal gains in the sarcomatoid transformation of chromophobe renal cell carcinoma. *Modern pathology : an official journal of the United States and Canadian Academy of Pathology, Inc*. 2007; 20:303–9.
44. Guertin DA, Sabatini DM. The pharmacology of mTOR inhibition. *Science signaling*. 2009; 2:e24.
45. Krymskaya VP, Goncharova EA. PI3K/mTORC1 activation in hamartoma syndromes: therapeutic prospects. *Cell Cycle*. 2009; 8:403–13.
46. Hudes G, Carducci M, Tomczak P, Dutcher J, Figlin R, Kapoor A, et al. Temsirolimus, interferon alfa, or both for advanced renal-cell carcinoma. *The New England journal of medicine*. 2007; 356:2271–81.
47. Voss MH, Bastos DA, Karlo CA, Ajeti A, Hakimi AA, Feldman DR, et al. Treatment outcome with mTOR inhibitors for metastatic renal cell carcinoma with nonclear and sarcomatoid histologies. *Annals of oncology : official journal of the European Society for Medical Oncology/ESMO*. 2014; 25:663–8.
48. Chen J, Huang D, Rubera I, Futami K, Wang P, Zickert P, et al. Disruption of tubular Flcn expression as a mouse model for renal tumor induction. *Kidney international*. 2015.
